# Supplementary material for: Multi-kingdom microbial signatures in excess body weight colorectal cancer based on global metagenomic analysis
Source: PubMed Central journal article supplement (PMC10770074; doi:10.1038/s42003-023-05714-0), 2024-01-05
Supplement: 42003_2023_5714_MOESM2_ESM.pdf [file 42003_2023_5714_MOESM2_ESM.pdf]

## Description of Additional Supplementary Files

**File name:** Supplementary Data 1

**Description:** Characteristics of fecal metagenomics samples included in the study

**File name:** Supplementary Data 2

**Description:** Differential microbial species between EBW-CRC and EBW-CTR

**File name:** Supplementary Data 3

**Description:** Differential microbial species between lean-CRC and lean-CTR

**File name:** Supplementary Data 4

**Description:** Common differential species between EBW-CRC and lean-CRC

**File name:** Supplementary Data 5

**Description:** Differential species specific for EBW-CRC

**File name:** Supplementary Data 6

**Description:** Differential species specific for lean-CRC

**File name:** Supplementary Data 7

**Description:** Co-abundance correlations in EBW-CRC

**File name:** Supplementary Data 8

**Description:** Co-abundance correlations in EBW-CTR

**File name:** Supplementary Data 9

**Description:** Co-abundance correlations in lean-CRC

**File name:** Supplementary Data 10

**Description:** Co-abundance correlations in lean-CTR

**File name:** Supplementary Data 11

**Description:** Differential KO genes between EBW-CRC and EBW-CTR

**File name:** Supplementary Data 12

**Description:** Differential KO genes between lean-CRC and lean-CTR

**File name:** Supplementary Data 13

**Description:** Common differential KO genes between EBW-CRC and lean-CRC

**File name:** Supplementary Data 14

**Description:** Differential KO genes specific for EBW-CRC

**File name:** Supplementary Data 15

**Description:** Differential KO genes specific for lean-CRC

**File name:** Supplementary Data 16

**Description:** Differential pathways between EBW-CRC and EBW-CTR

**File name:** Supplementary Data 17

**Description:** Differential pathways between lean-CRC and lean-CTR

**File name:** Supplementary Data 18

**Description:** Performances of the models constructed with different combinations of multi-kingdom signatures for lean-CRC

**File name:** Supplementary Data 19

**Description:** Associations between differential species and differential pathways in EBW-CRC

**File name:** Supplementary Data 20

**Description:** Associations between differential species and differential pathways in lean-CRC

**File name:** Supplementary Data 21

**Description:** Numerical source data for all graphs and charts in the manuscript
